# Supplementary material for: Intraobserver Repeatability and Interobserver Reproducibility of Foveal Cone Density Measurements in CNGA3- and CNGB3-Associated Achromatopsia
Source: PubMed Central journal article supplement (PMC7414701; doi:10.1167/tvst.9.7.37), 2020-06-26
Supplement: tvst-9-7-37_s001.pdf [file tvst-9-7-37_s001.pdf]

Supplementary Table. Subject Demographics and Genetics

| Subject ID                | Sex | Age (years) | Variant 1     |                   | Variant 2     |                   |
|---------------------------|-----|-------------|---------------|-------------------|---------------|-------------------|
|                           |     |             | c.DNA Change  | AA Change         | c.DNA -Change | AA Change         |
| <b>Gene: <i>CNGA3</i></b> |     |             |               |                   |               |                   |
| JC_10069                  | M   | 18          | 847C>T        | Arg283Trp         | 542A>G        | Tyr181Cys         |
| KS_10088                  | F   | 64          | 450-1G>A      | fs                | 1157G>A       | Met519Ile         |
| KS_10337                  | F   | 17          | 940_942delATC | Ile214del         | 1114C>T       | Pro372Ser         |
| MM_0002                   | F   | 41          | 1443-1444insC | Ile482His fs*6/c  | 1706G>A       | Arg569His         |
| MM_0009                   | F   | 14          | 536T>A        | Val179Asp         | ND            | ND                |
| MM_0014                   | F   | 35          | 848G>A        | Arg283Gln         | 667C>T        | Arg223Trp         |
| MM_0015                   | F   | 28          | 848G>A        | Arg283Gln         | 667C>T        | Arg223Trp         |
| MM_0016                   | M   | 30          | 848G>A        | Arg283Gln         | 667C>T        | Arg223Trp         |
| MM_0064                   | F   | 23          | 1694C>T       | Thr565Met         | 661C>T        | Arg221Ter         |
| MM_0167                   | F   | 28          | 847C>T        | Arg283Trp         | 1279C>T       | Arg427Cys         |
| MM_0171                   | M   | 22          | 1001C>T       | Ser334Phe         | 1360A>T       | Lys454Ter         |
| MM_0239                   | M   | 37          | 848G>A        | Arg283Gln         | 667C>T        | Arg223Trp         |
| MM_0385                   | M   | 37          | 1228C>G       | Arg410Trp         | 1228C>G       | Arg410Trp         |
| MM_0386                   | F   | 22          | 1580T>G       | Leu527Arg         | 1805G>A       | Gly602Glu         |
| MM_0398                   | F   | 14          | 811C>T        | Pro271Ser         | 829C>T        | Arg277Cys         |
| <b>Gene: <i>CNGB3</i></b> |     |             |               |                   |               |                   |
| MM_0005                   | M   | 27          | 1148delC      | Thr383Ile fs * 13 | 607-608insT   | Arg203Leu fs * 3  |
| MM_0029                   | F   | 15          | 595delG       | Glu199fs          | 1148delC      | Thr383Ile fs * 13 |
| MM_0040                   | M   | 38          | 1148delC      | Thr383Ile fs * 13 | 1148delC      | Thr383Ile fs * 13 |
| MM_0116                   | M   | 24          | 595delG       | Glu199fs          | 1148delC      | Thr383Ile fs * 13 |
| MM_0117                   | M   | 20          | 1148delC      | Thr383Ile fs * 13 | 1148delC      | Thr383Ile fs * 13 |
| MM_0122                   | F   | 18          | 1148delC      | Thr383Ile fs * 13 | 1148delC      | Thr383Ile fs * 13 |
| MM_0123                   | M   | 51          | 1148delC      | Thr383Ile fs * 13 | 1148delC      | Thr383Ile fs * 13 |
| MM_0125                   | F   | 23          | 1148delC      | Thr383Ile fs * 13 | 1148delC      | Thr383Ile fs * 13 |
| MM_0162                   | F   | 17          | 1148delC      | Thr383Ile fs * 13 | 1148delC      | Thr383Ile fs * 13 |
| MM_0327                   | F   | 19          | 412delA       | Arg138Glf s * 14  | 1432C>T       | Arg478Ter         |
| MM_0328                   | F   | 23          | 412delA       | Arg138Glf s * 14  | 1432C>T       | Arg478Ter         |
| MM_0345                   | F   | 32          | 1148delC      | Thr383Ile fs * 13 | 1148delC      | Thr383Ile fs * 13 |
| MM_0347                   | F   | 15          | 1148delC      | Thr383Ile fs * 13 | 1148delC      | Thr383Ile fs * 13 |
| MM_0361                   | F   | 26          | 1148delC      | Thr383Ile fs * 13 | 1148delC      | Thr383Ile fs * 13 |
| MM_0375                   | F   | 21          | 819_826del    | Arg274Valfs* 13   | 1148delC      | Thr383Ile fs * 13 |
